# Supplementary material
Source: publisher figshare collection journal article supplement (https://tandf.figshare.com/ndownloader/files/12339707)
Supplement: Supplementary file 1 [file 12339707]

Supplementary Table 1: Baseline clinical data of the nine participants

| **Patient**  **number** | **Gender** |  | **Chronological**  **Age**  **(years)** | | **Bone age (years)** | **Pubertal stage**  **(Tanner)** | **Growth velocity prior to the study (cm/year)** | **Stimulated GH (ng/ml)** | **Mid-parental height-SDS** |
| --- | --- | --- | --- | --- | --- | --- | --- | --- | --- |
| 1 | male |  | 7.9 | | 5.7 | 1 | 4.00 | 15.0 | -0.4 |
| 2 | male |  | 10.7 | | 9.0 | 1 | 5.20 | 18.2 | -0.7 |
| 3 | male |  | 9.8 | | 9.0 | 1 | 4.90 | 18.6 | 0.2 |
| 4 | male |  | 14.0 | | 12.0 | 1 | 5.00 | 24.6 | -1.1 |
| 5 | female |  | 11.3 | | 10.5 | 1 | 5.50 | 14.3 | -1.4 |
| 6 | male |  | 10.0 | | 6.8 | 1 | 4.80 | 9.8 | -1.1 |
| 7 | male |  | 10.3 | | 10.5 | 1 | 3.30 | 11.2 | -1.2 |
| 8 | female |  | 12.2 | | 10.5 | 1-2 | 5.50 | 15.2 | 0.0 |
| 9 | male |  | 11.7 | | 10.5 | 1 | 5.40 | 14.4 | -0.8 |
| Mean±SD |  |  | | 10.9±1.7 | 9.4±2.0 |  | 4.8±0.7 | 15.7±4.4 | -0.73±0.60 | |
